# Supplementary material for: Self-Consistent Grain Size Evolution controls Strain Localization during Rifting
Source: Research Square preprint supplement (doi:10.21203/rs.3.rs-561920/v1), 2021-06-22
Supplement: Supplementary file 1 [file 2ef06f5455fc719c69f37dd4.xlsx]

## Sheet: Sheet1
Table S2: Flow law parameters
Rock type	Deformation mode	AD (Pa-n -p)	n (-)	m (-)	fH2O (Pa)*	r (-)	Q (kJ/mol)	Reference
Sticky-air	linear	5·10-18	1	-	-	-	-	Crameri et al., 2012
Sediments (quartzite)	dislocation	6.31·10-36	4	0	5521·106·exp(-(31.28·10-3-2.009·10-5·P)/(R·T))	1	135	Hirth et al., 2001
	diffusion	6.31·10-19	1	2	-	-	220	Brodie and Rutter, 2000
Upper continental crust (quartzite)	dislocation	6.31·10-36	4	0	5521·106·exp(-(31.28·10-3-2.009·10-5·P)/(R·T))	1	135	Hirth et al., 2001;
	diffusion	6.31·10-19	1	2	-	-	220	Brodie and Rutter, 2000
Lower continental crust (anorthite)	dislocation	5.01·10-12	3	0	-	-	648	Rybacki and Dresen, 2000
	diffusion	1.26·10-12	1	3	-	-	467	Rybacki and Dresen, 2000
Oceanic crust (anothite-diopsid 50/50)	dislocation	2.14·10-16	4.1	0	-	-	723	Dimanov and Dresen, 2005
	diffusion	1.21·10-19	1	3	-	-	436	Dimanov and Dresen, 2005
Dry upper mantle (olivine)	dislocation	1.1·10-16	3.5	0	-	-	530+17·10-6·P	Hirth and Kohlstedt, 2003
	diffusion	1.5·10-15	1	3	-	-	375+6·10-6·P	Hirth and Kohlstedt, 2003
Wet upper mantle (olivine)	dislocation	9·10-20	3.5	0	COH	1.2	480+11·10-6·P	Hirth and Kohlstedt, 2003
	diffusion	1·10-18	1	3	COH	1	335+4·10-6·P	Hirth and Kohlstedt, 2003
*Water fugacity after Shinevar et al. (2015); COH = 50, 175, 600, 2500 H/106Si
