# Supplementary material for: Self-Consistent Grain Size Evolution controls Strain Localization during Rifting
Source: Research Square preprint supplement (doi:10.21203/rs.3.rs-561920/v1), 2021-06-22
Supplement: Supplementary file 2 [file 50bae3025ebe90e1b618876d.xlsx]

## Sheet: Sheet1
Table S3: Thermal parameters
Rock type	CP (kg/m3)	k (W/m/K)	a (1/K)	b (1/Pa)	Hr (-)
Olivine	3·106	200	0	-	-
Sediments	1000	2.5	2·10-5	4.5·10-12	2·10-6
Upper continental crust	1000	2	2·10-5	4.5·10-12	2·10-6
Lower continental crust	1000	1.6	2·10-5	4.5·10-12	2·10-7
Oceanic crust	1000	2	2·10-5	4.5·10-12	2·10-7
Upper mantle	1000	1.6	2·10-5	4.5·10-12	2·10-8
Cp = Heat capacity
k = Thermal conductivity
a = Thermal expanivity
b = Compressibility
Hr = Radioactive heating
