# Supplementary material for: Self-Consistent Grain Size Evolution controls Strain Localization during Rifting
Source: Research Square preprint supplement (doi:10.21203/rs.3.rs-561920/v1), 2021-06-22
Supplement: Supplementary file 5 [file 723103298564edba0c7195a0.xlsx]

## Sheet: Sheet1
Table S4: Grain size evolution parameters
Rock type	Upper mantle (olivine)	Reference
Reduction parameters
c (-)	3.1415	Austin and Evans, 2007
g (J/m2)	1.4	Duyster and Stöckert, 2001
l (-)	0.01	this study
Growth parameters
Kg (mp/s)*	3	Speciale et al., 2020
p (-)	3.2	Speciale et al., 2020
fH2O (Pa)†	COH	Hirth and Kohlstedt, 1996
Eg (kJ/mol)	620	Speciale et al., 2020
Vg (m3/mol)	5·10-6	Speciale et al., 2020
*Value adapted for reference model with COH = 600 H/106Si
†COH = 50, 175, 600, 2500 H/106Si
