# Supplementary material for: Self-Consistent Grain Size Evolution controls Strain Localization during Rifting
Source: Research Square preprint supplement (doi:10.21203/rs.3.rs-561920/v1), 2021-06-22
Supplement: Supplementary file 6 [file f5b1e947997b35e5422c2ebc.xlsx]

## Sheet: Sheet1
Table S1: Material parameters
Rock type	rr (kg/m3)	G (GPa)	j (°)†	C (MPa)†	lf (-)
Sticky-air	1	100	-	-	-
Sediments	2500	100	30 (15)	10 (1)	0.7
Upper continental crust	2700	100	30 (15)	25 (1)	0.4
Lower continental crust	2800	100	30 (15)	25 (1)	0
Oceanic crust	3000	100	30 (15)	25 (1)	0
Upper mantle	3300	100	30	25 (10)	0
† Values in brackets indicate strain weakened value
